# Supplementary material
Source: PubMed Central journal article supplement (PMC4178684)
Supplement: AEM.01357-14_zam999105668so1.pdf [file AEM.01357-14_zam999105668so1.pdf]

- 1 **Supplementary Table 1.** List of KEGG pathways predicted from the abundance of the gut microbiota after a dietary change to normal diet  
 2 with metformin treatment.

|                                           | <b>High-fat diet</b>                                  | <b>Normal diet</b>                                       |
|-------------------------------------------|-------------------------------------------------------|----------------------------------------------------------|
|                                           | <b>Change to normal diet (<i>n</i> = 11)</b>          | <b>Metformin treatment (<i>n</i> = 45)</b>               |
| Benzoate degradation                      | Aminobenzoate degradation                             | African trypanosomiasis                                  |
| Biosynthesis of ansamycins                | Arachidonic acid metabolism                           | alpha-Linolenic acid metabolism                          |
| Chloroalkane and chloroalkene degradation | <b>Ascorbate and aldarate metabolism</b>              | Aminoacyl-tRNA biosynthesis                              |
| D-Alanine metabolism                      | <b>Biosynthesis of unsaturated fatty acids</b>        | Aminobenzoate degradation                                |
| Dioxin degradation                        | <b>Bisphenol degradation</b>                          | Amyotrophic lateral sclerosis (ALS)                      |
| Glycerolipid metabolism                   | Caprolactam degradation                               | Apoptosis                                                |
| Nitrotoluene degradation                  | Carotenoid biosynthesis                               | Arachidonic acid metabolism                              |
| Porphyrin and chlorophyll metabolism      | Chlorocyclohexane and chlorobenzene degradation       | Atrazine degradation                                     |
| Protein kinases                           | Ether lipid metabolism                                | Bacterial chemotaxis                                     |
| Tetracycline biosynthesis                 | <b>Fatty acid elongation in mitochondria</b>          | Bacterial motility proteins                              |
| Xylene degradation                        | <b>Fatty acid metabolism</b>                          | Bile secretion                                           |
|                                           | Flavonoid biosynthesis                                | Biosynthesis and biodegradation of secondary metabolites |
|                                           | Fluorobenzoate degradation                            | Biosynthesis of siderophore group nonribosomal peptides  |
|                                           | <b>Geraniol degradation</b>                           | Caprolactam degradation                                  |
|                                           | <b>Glycosaminoglycan degradation</b>                  | Cardiac muscle contraction                               |
|                                           | Limonene and pinene degradation                       | Carotenoid biosynthesis                                  |
|                                           | <b>Linoleic acid metabolism</b>                       | Chagas disease (American trypanosomiasis)                |
|                                           | <b>Lipoic acid metabolism</b>                         | Chlorocyclohexane and chlorobenzene degradation          |
|                                           | <b>Lipopolysaccharide biosynthesis</b>                | Colorectal cancer                                        |
|                                           | <b>Lipopolysaccharide biosynthesis proteins</b>       | D-Arginine and D-ornithine metabolism                    |
|                                           | Nitrotoluene degradation                              | Electron transfer carriers                               |
|                                           | <b>Sphingolipid metabolism</b>                        | Ether lipid metabolism                                   |
|                                           | Steroid biosynthesis                                  | Ethylbenzene degradation                                 |
|                                           | <b>Steroid hormone biosynthesis</b>                   | Flagellar assembly                                       |
|                                           | Stilbenoid, diarylheptanoid and gingerol biosynthesis | Flavone and flavonol biosynthesis                        |
|                                           | <b>Styrene degradation</b>                            | Flavonoid biosynthesis                                   |

**Synthesis and degradation of ketone bodies**

**Toluene degradation**

**Tryptophan metabolism**

**Valine, leucine and isoleucine degradation**

Fluorobenzoate degradation

Germination

Influenza A

Inorganic ion transport and metabolism

Insulin signaling pathway

Limonene and pinene degradation

Meiosis – yeast

Nitrotoluene degradation

Non-homologous end-joining

Parkinson's disease

Polycyclic aromatic hydrocarbon degradation

Polyketide sugar unit biosynthesis

Small cell lung cancer

Sporulation

Steroid biosynthesis

Stilbenoid, diarylheptanoid and gingerol biosynthesis

Toxoplasmosis

Two-component system

Viral myocarditis

---

3 Pathways in bold typeface were unique among the 18 KEGG pathways predicted during metformin treatment in mice on a HFD.

4

5
